# Supplementary material for: Cu(ii) sorption by biogenic birnessite produced byPseudomonas putidastrain MnB1: structural differences from abiotic birnessite and its environmental implications
Source: Royal Society of Chemistry journal article supplement (doi:10.1039/c7ce02168b), 2018-01-01
Supplement: c7ce02168b1.pdf [file c7ce02168b1.pdf]

## Supplementary Information

### **Cu(II) sorption by biogenic birnessite produced by *Pseudomonas putida* strain MnB1: Structural differences from abiotic birnessite and its environmental implications**

Yuwei Liu <sup>a</sup>, Yan Li <sup>\*a</sup>, Ning Chen <sup>b</sup>, Hongrui Ding <sup>a</sup>, Huiqin Zhang <sup>a</sup>, FeiFei Liu <sup>a</sup>, Hui Yin <sup>c</sup>, Shengqi Chu <sup>d</sup>, Changqiu Wang <sup>a</sup>, Anhuai Lu <sup>\*a</sup>

<sup>a</sup> *The Key Laboratory of Orogenic Belts and Crustal Evolution, Beijing Key Laboratory of Mineral Environmental Function, School of Earth and Space Sciences, Peking University, Beijing 100871, PR China.*

<sup>b</sup> *Canadian Light Source, 44 Innovation Boulevard, Saskatoon, SK S7N 2V3, Canada*

<sup>c</sup> *Key Laboratory of Arable Land Conservation (Middle and Lower Reaches of Yangtze River), Ministry of Agriculture, College of Resources and Environment, Huazhong Agricultural University, Wuhan 430070, PR China*

<sup>d</sup> *Beijing Synchrotron Radiation Facility, Institute of High Energy Physics, Chinese Academy of Sciences, Beijing 100039, PR China*

---

\* Correspondence Author: Yan Li, liyan-pku@pku.edu.cn; Anhuai Lu, ahlu@pku.edu.cn.

## TABLES

**Table S1.** Mn 2p 3/2 fitting parameters obtained from Mn(IV), Mn(III) and Mn(II) multiplet peak fitting for abio- and bio-birnessite samples

|         |                      | Abio-birnessite | Bio-birnessite |
|---------|----------------------|-----------------|----------------|
| Mn(IV)  | Binding energy* (eV) | 642.3           | 642.0          |
|         | FWHM† (eV)           | 2.75            | 3.00           |
|         | Proportion‡ (%)      | 77.8            | 92.6           |
| Mn(III) | Binding energy (eV)  | 641.5           | 641.5          |
|         | FWHM (eV)            | 1.40            | 0.80           |
|         | Proportion (%)       | 22.2            | 4.9            |
| Mn(II)  | Binding energy (eV)  | -               | 640.5          |
|         | FWHM (eV)            | -               | 0.80           |
|         | Proportion (%)       | 0               | 2.5            |

\* The binding energy is constrained during fitting, as 641.9-642.6 eV for Mn(IV), 641.2-641.7 eV for Mn(III) and 640.0-640.9 eV for Mn(II).

† Full width at half maxima (constrained during fitting). All peaks modeled as Gaussian-Lorentzian = 50: 50.

‡ The area contribution of each peak under the Mn 2p<sub>3/2</sub> peak.

## FIGURES

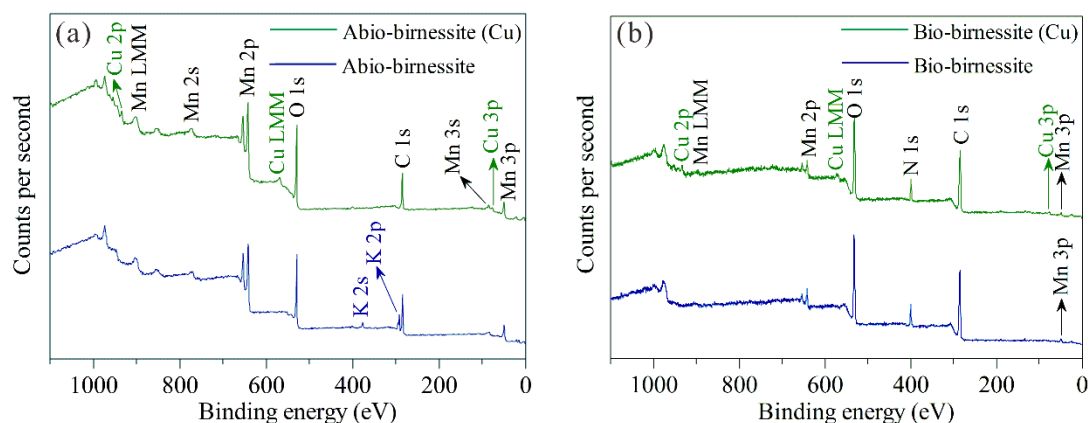

**Fig. S1** XPS survey scans (broad scans) of (a) abio-birnessite and (b) bio-birnessite samples, both before and after Cu(II) adsorption. Texts in black indicate the photoelectron lines present on both raw and Cu(II)-adsorbed birnessite samples, while texts in green and blue refer to those distinguishable from each other.

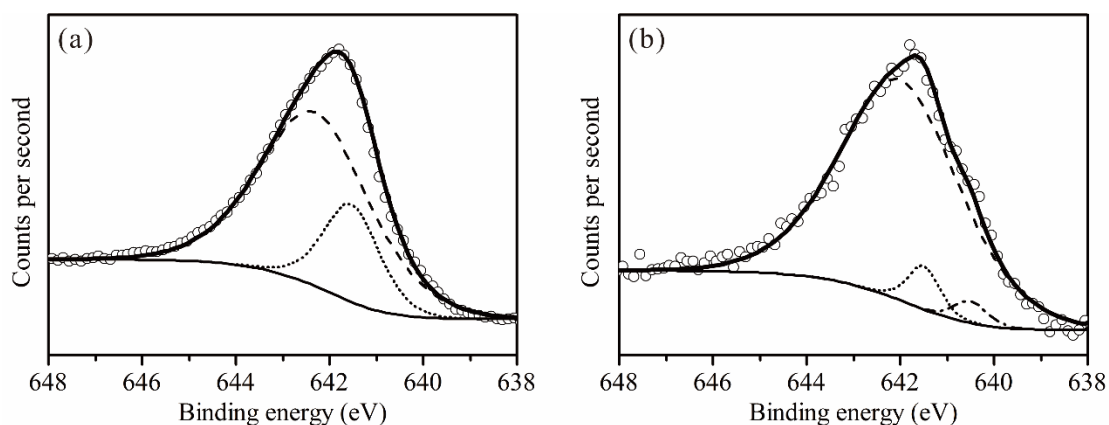

**Fig. S2** XPS narrow scans of Mn 2p<sub>3/2</sub> spectra (circle symbols) for (a) abio-birnessite and (b) bio-birnessite samples, plotted with the best fits (thick solid lines) as presented in Table S1. Deconvoluted peak fittings are conducted with Mn(IV) (dashed lines), Mn(III) (dotted lines), Mn(II) (dash-dotted lines) multiplet peaks and Shirley background (thin solid lines).

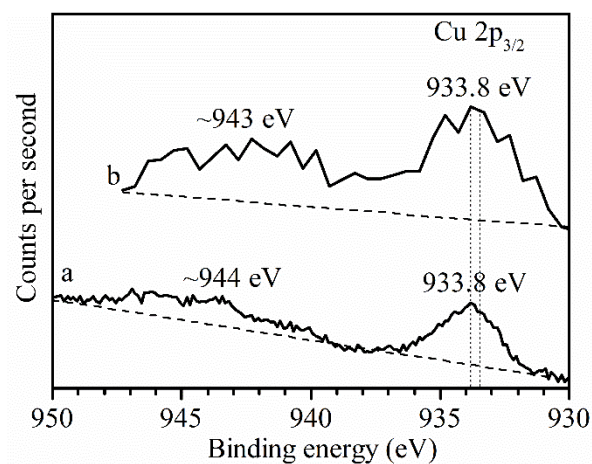

**Fig. S3** XPS spectra of Cu 2p<sub>3/2</sub> for Cu(II)-adsorbed abio-birnessite (**a**) and bio-birnessite (**b**). Both spectra display a peak maxima at 933.8 eV and a shake-up satellite at ~943-944 eV (~9 eV higher from the main peak), confirming the presence of Cu(II). Dashed lines are the linear baselines. (Notes: the spectrum of bio-birnessite is obtained from the survey scans and thus has larger energy size and fewer data points; yet still the broad shake-up satellite can be recognized, and the peak maxima can be positioned within 933.4-933.9 eV as indicated by the dotted vertical lines)
